# Supplementary material
Source: PubMed Central journal article supplement (PMC2694753)
Supplement: NIHMS99403-supplement-01.pdf [file NIHMS99403-supplement-01.pdf]

## Supplemental Data

### Selected Toll-like Receptor Ligands and Viruses

### Promote Helper-Independent Cytotoxic T Cell

### Priming by Upregulating CD40L on Dendritic Cells

Susan Johnson, Yifan Zhan, Robyn M. Sutherland, Adele M. Mount, Sammy Bedoui, Jamie L. Brady, Emma M. Carrington, Lorena E. Brown, Gabrielle T. Belz, William R. Heath, and Andrew M. Lew

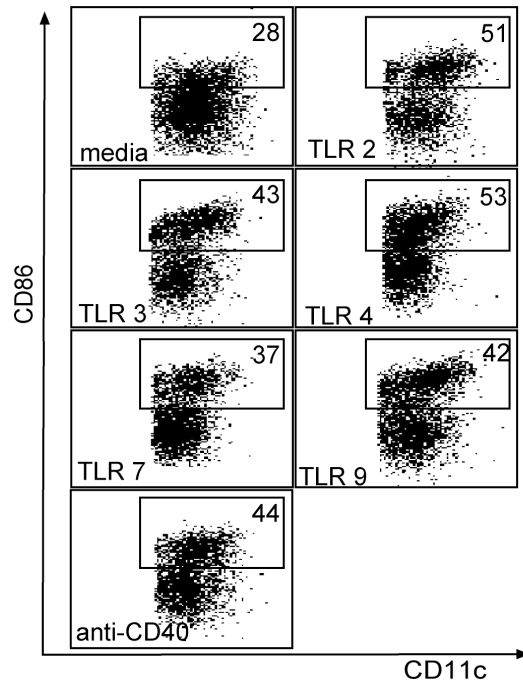

Figure S1. All TLR agonists upregulate CD86 above the unstimulated control. DCs were purified and cultured for 8 hours with a panel of agonists for TLR 2,3,4,7 and 9. Dot plots show expression of surface CD86 on gated CD11c<sup>+</sup> cells from C57BL/6 mice.

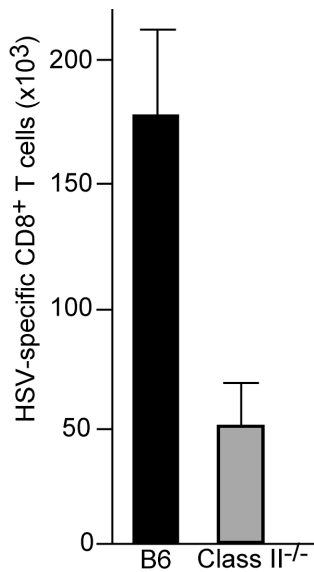

Figure S2. Cytotoxic T cell responses to HSV are mostly helper dependent C57BL/6 or MHC Class II<sup>-/-</sup> mice were flank infected with HSV-1. 6 days later draining lymph nodes were harvested and stained with CD8<sup>+</sup> gB specific tetramer and total CD8<sup>+</sup> gB specific cell number observed by flow cytometry. The graph shows mean  $\pm$  SEM.
